# Supplementary material
Source: publisher figshare collection journal article supplement (https://asha.figshare.com/articles/dataset/_/25345708)
Supplement: Supplementary file 1 [file 1]

**Supplemental Table S3.** Mean percentage of time oral language and early literacy activities were observed in classrooms.

| Activity                                    | TELL | BAU  |
|---------------------------------------------|------|------|
| Book Reading with Child Participation       | 0.07 | 0.04 |
| Book Reading without Child Participation    | 0.01 | 0.01 |
| Book Walk                                   | 0.03 | 0.01 |
| Book Story Retell                           | 0.03 | 0.01 |
| Alphabet Letter Identification              | 0.12 | 0.07 |
| Alphabet Letter Sounds                      | 0.07 | 0.04 |
| Phonological Awareness Environmental Sounds | 0.00 | 0.00 |
| Phonological Awareness Words that Rhyme     | 0.02 | 0.01 |
| Phonological Awareness Clapping Syllables   | 0.01 | 0.00 |
| Phonological Awareness Beginning Sounds     | 0.05 | 0.04 |
| Print Awareness                             | 0.17 | 0.10 |
| Writing                                     | 0.11 | 0.10 |
| Vocabulary Say New Words                    | 0.24 | 0.09 |
| Vocabulary Define New Words                 | 0.15 | 0.05 |
| Vocabulary Practice New Words               | 0.12 | 0.03 |
| Vocabulary Visual Support                   | 0.15 | 0.04 |
| Language Teaching Modelling                 | 0.19 | 0.17 |
| Language Teaching Prompts                   | 0.46 | 0.43 |
