# Supplementary material
Source: publisher figshare collection journal article supplement (https://asha.figshare.com/articles/dataset/_/25345708)
Supplement: Supplementary file 2 [file 1]

**Supplemental Table S1.** Professional development training topics.

| Session Number | Topics                                                                                                                                                                                                                                          |
|----------------|-------------------------------------------------------------------------------------------------------------------------------------------------------------------------------------------------------------------------------------------------|
| 1              | Orientation to TELL and the research plan<br>How to use lesson plans<br>Creating an effective TELL classroom schedule                                                                                                                           |
| 2              | Components of a language and literacy rich classroom<br>How children learn new words – vocabulary instruction                                                                                                                                   |
| 3              | Why different text types are important for young children<br>Dialogic reading – small group rotation 1<br>Managing small group rotations                                                                                                        |
| 4              | The key role of Phonological Awareness in early literacy and reading<br>Developmentally appropriate direct instruction in preschool<br>Planning for small group rotations 2 & 3 to integrate social, math, and science curricula and activities |
| 5              | Oral Language is the foundation for future reading and academic success<br>Boosting oral language development throughout the day                                                                                                                |
| 6              | The importance of curriculum-based measures<br>Differentiated instruction<br>Using data to plan instruction during review weeks                                                                                                                 |
| 7              | The key role of print awareness and alphabet knowledge in early literacy and reading<br>Strategies for effective whole group teaching and transitions<br>Leveraging parent support for learning                                                 |
| 8              | Importance of free play<br>Planning meaningful and engaging indoor and outdoor free play activities<br>Supporting language development during free play                                                                                         |
| 9              | Writing and spelling development in young children<br>Differentiating instruction review                                                                                                                                                        |
