# Supplementary material
Source: publisher figshare collection journal article supplement (https://asha.figshare.com/articles/dataset/_/25345708)

**Supplemental Figure S9.** Preschool Early Literacy Indicators (PELI) Phonological Awareness subtest observed means, standard error bars, and between-group *t* test results.

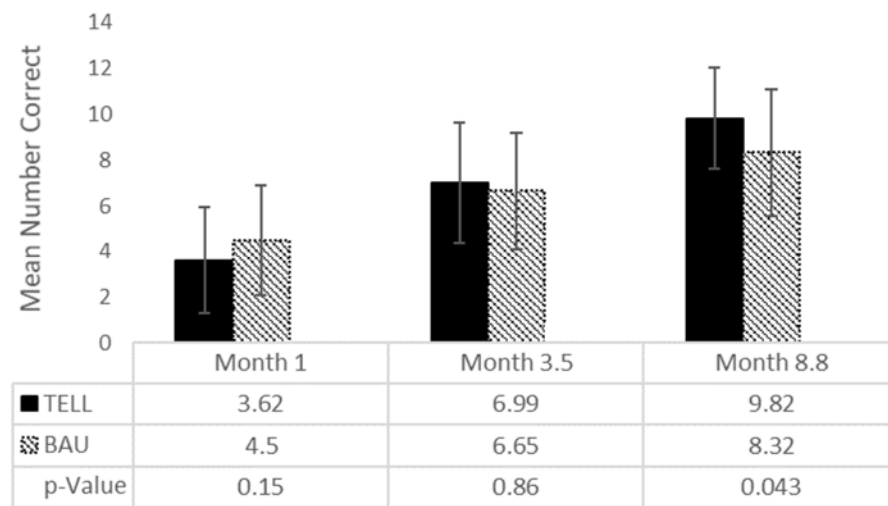

Supplement: Supplementary file 8 [file 1]
