# Supplementary material
Source: publisher figshare collection journal article supplement (https://asha.figshare.com/articles/dataset/_/25345708)
Supplement: Supplementary file 9 [file 1]

**Supplemental Table S2.** TELL Classroom Quality of Implementation and Fidelity Assessment.

TELL Classroom Quality of Implementation and Fidelity Assessment

Teacher ID:

Coach ID:

Date:

Fidelity

☐ Yes ☐ No ☐ Teacher Reported

Quality of Implementation

☐ No Opportunity ☐ Below Expectation ☐ Approaches ☐ Meets ☐ Exceeds

| Activity                                                                                                                                                                                                         | Notes | Fidelity                                                                                                                                                                                                                                                    | Quality of Implementation |
|------------------------------------------------------------------------------------------------------------------------------------------------------------------------------------------------------------------|-------|-------------------------------------------------------------------------------------------------------------------------------------------------------------------------------------------------------------------------------------------------------------|---------------------------|
| Note: Activities in RED are scored for fidelity. Activities in BLUE are scored together within each activity for quality of implementation.                                                                      |       |                                                                                                                                                                                                                                                             |                           |
| 1. Arrival/Sign In<br>Includes at least one of the following:<br><input type="checkbox"/> Alphabet/Phonological Awareness<br><input type="checkbox"/> Writing Practice/Name Recognition/Name Writing Practice    |       |                                                                                                                                                                                                                                                             | 0 1 2 3 4                 |
| 2. Whole Group<br>Includes each of the following:<br>a. Letter/Sound Warm Up or Rhythmic Pattern<br>b. Music and Movement<br>c. ABC Action Card<br>Starts and ends according to schedule, lasts about 15 minutes |       | <div><input type="checkbox"/><input type="checkbox"/><input type="checkbox"/></div> <div><input type="checkbox"/><input type="checkbox"/><input type="checkbox"/></div> <div><input type="checkbox"/><input type="checkbox"/><input type="checkbox"/></div> | 0 1 2 3 4                 |

|                                                                                                                                                                                                                                                                                                                                                                                                                                                                                                                   |  |                                                                                                                                                                                                                                                             |       |
|-------------------------------------------------------------------------------------------------------------------------------------------------------------------------------------------------------------------------------------------------------------------------------------------------------------------------------------------------------------------------------------------------------------------------------------------------------------------------------------------------------------------|--|-------------------------------------------------------------------------------------------------------------------------------------------------------------------------------------------------------------------------------------------------------------|-------|
| <div><input type="checkbox"/> Engages child prior to providing instruction</div> <div><input type="checkbox"/> Rephrases questions or comments to simplify language</div> <div><input type="checkbox"/> Provides choices when a child doesn't respond</div> <div><input type="checkbox"/> Uses vocabulary teaching strategies (e.g. SEER, explicit teaching)</div> <div><input type="checkbox"/> Recasts and expands child utterances</div> <div><input type="checkbox"/> Says/asks for letter names/sounds</div> |  |                                                                                                                                                                                                                                                             | 01234 |
| <div><b>3. Dialogic Reading (Small Group Rotation)</b></div> <div>Includes each of the following:</div> <div><div>a. Vocabulary Practice and/or Letter ID</div><div>b. Dialogic Reading of Book or Use of Book for Retell/Summary</div><div>c. Dialogic Reading Activity in Lesson Plan</div></div> <div>Prepares the book ahead of time</div> <div>Children are grouped to facilitate differentiated instruction</div> <div>Starts and ends according to schedule, lasts about 15 minutes</div>                  |  | <div><input type="checkbox"/><input type="checkbox"/><input type="checkbox"/></div> <div><input type="checkbox"/><input type="checkbox"/><input type="checkbox"/></div> <div><input type="checkbox"/><input type="checkbox"/><input type="checkbox"/></div> | 01234 |

|                                                                                                                                                                                                                                                                                                                                                                                                                                                                                                                                                                                                                                                                                                                                                                                                  |                                                  |                                                                                                                                                                                                                                                         |                                           |
|--------------------------------------------------------------------------------------------------------------------------------------------------------------------------------------------------------------------------------------------------------------------------------------------------------------------------------------------------------------------------------------------------------------------------------------------------------------------------------------------------------------------------------------------------------------------------------------------------------------------------------------------------------------------------------------------------------------------------------------------------------------------------------------------------|--------------------------------------------------|---------------------------------------------------------------------------------------------------------------------------------------------------------------------------------------------------------------------------------------------------------|-------------------------------------------|
| <b>Dialogic Reading (Small Group Rotation) – continued</b> <ul style="list-style-type: none"> <li><input type="checkbox"/> Discusses parts of book</li> <li><input type="checkbox"/> Models print concepts</li> <li><input type="checkbox"/> Engages child prior to providing instruction</li> <li><input type="checkbox"/> Rephrases questions or comments to simplify language</li> <li><input type="checkbox"/> Uses vocabulary teaching strategies (e.g. SEER, explicit teaching)</li> <li><input type="checkbox"/> Recasts and expands child utterances</li> <li><input type="checkbox"/> Encourages discussion</li> <li><input type="checkbox"/> Asks high level questions</li> <li><input type="checkbox"/> Uses a variety of prompts (e.g. recall, open-ended, Wh-distancing)</li> </ul> |                                                  |                                                                                                                                                                                                                                                         | <div>0 1 2 3 4</div>                      |
| <b>4. Explicit Teaching Activity (Small Group Rotation)</b><br>Includes each of the following: <ul style="list-style-type: none"> <li>a. Letter Name Warm Up</li> <li>b. Activity Card</li> <li>c. Children are actively involved in the social story (if scheduled)</li> </ul> Children are grouped to facilitate differentiated instruction<br>Teacher effectively uses I DO, WE DO, YOU DO, and closure <ul style="list-style-type: none"> <li><input type="checkbox"/> Engages child prior to providing instruction</li> <li><input type="checkbox"/> Rephrases questions or comments to simplify language</li> <li><input type="checkbox"/> Provides choices when a child doesn't respond</li> <li><input type="checkbox"/> Says/asks for letter names/sounds</li> </ul>                    | (Day-dependent: PA, Math, Science, Social Story) | <div> <input type="checkbox"/> <input type="checkbox"/> <input type="checkbox"/><br/> <input type="checkbox"/> <input type="checkbox"/> <input type="checkbox"/><br/> <input type="checkbox"/> <input type="checkbox"/> <input type="checkbox"/> </div> | <div>0 1 2 3 4</div> <div>0 1 2 3 4</div> |
| <b>5. Independent Activity (Small Group Rotation)</b><br>Includes each of the following: <ul style="list-style-type: none"> <li>a. Teaching objective for the activity</li> <li>b. Materials prepped and available</li> </ul> Starts and ends according to schedule, last about 15 minutes                                                                                                                                                                                                                                                                                                                                                                                                                                                                                                       | (Day-dependent: PA, Art, Math, Science)          |                                                                                                                                                                                                                                                         | <div>0 1 2 3 4</div>                      |
| <b>6. Meal/Snack Conversations</b><br>Includes each of the following: <ul style="list-style-type: none"> <li>a. Prompts Using Conversation Card, Question Jar, or Fact Chat Card</li> <li>b. Engages Children in Multi-Turn Conversations</li> </ul> Starts and ends according to schedule, last about 15 minutes <ul style="list-style-type: none"> <li><input type="checkbox"/> Engages child prior to providing instruction</li> <li><input type="checkbox"/> Rephrases questions or comments to simplify language</li> <li><input type="checkbox"/> Provides choices when a child doesn't respond</li> <li><input type="checkbox"/> Recasts and expands child utterances</li> <li><input type="checkbox"/> Points to letters/words/print; tracks print</li> </ul>                            |                                                  | <div> <input type="checkbox"/> <input type="checkbox"/> <input type="checkbox"/> </div>                                                                                                                                                                 | <div>0 1 2 3 4</div> <div>0 1 2 3 4</div> |



|                                                                                                                                                                                                                                                                                                                                                                                                                                                                                                                                                                                                                                                                                                                                     |  |                                                                                                                                                                                                                                        |                               |
|-------------------------------------------------------------------------------------------------------------------------------------------------------------------------------------------------------------------------------------------------------------------------------------------------------------------------------------------------------------------------------------------------------------------------------------------------------------------------------------------------------------------------------------------------------------------------------------------------------------------------------------------------------------------------------------------------------------------------------------|--|----------------------------------------------------------------------------------------------------------------------------------------------------------------------------------------------------------------------------------------|-------------------------------|
| <b>9. Outdoor Free Play</b><br>a. Materials prepped and available<br>b. Starts and ends according to schedule, lasts about 25 minutes<br>c. Includes at least <u>two</u> of the following:<br><input type="checkbox"/> Gross Motor Activity<br><input type="checkbox"/> Social Skills<br><input type="checkbox"/> Dramatic Play supports language and literacy development<br><input type="checkbox"/> Alphabet<br><input type="checkbox"/> Phonological Awareness<br><input type="checkbox"/> Writing or Drawing<br><input type="checkbox"/> Vocabulary Teaching<br><br><input type="checkbox"/> Teacher takes an active role in play modeling high level language<br><input type="checkbox"/> Encourages multi-turn conversations |  |                                                                                                                                                                                                                                        | 0      1      2      3      4 |
| <b>10. Transitions</b><br>a. Alphabet Knowledge<br>b. Vocabulary<br>c. Phonological Awareness                                                                                                                                                                                                                                                                                                                                                                                                                                                                                                                                                                                                                                       |  | <input type="checkbox"/> <input type="checkbox"/> <input type="checkbox"/><br><input type="checkbox"/> <input type="checkbox"/> <input type="checkbox"/><br><input type="checkbox"/> <input type="checkbox"/> <input type="checkbox"/> |                               |
| <b>11. Curriculum-Based Measures</b><br>For review weeks, uses CBM results to plan differentiated instruction                                                                                                                                                                                                                                                                                                                                                                                                                                                                                                                                                                                                                       |  |                                                                                                                                                                                                                                        | 0      1      2      3      4 |
| <b>12. Language &amp; Print Rich Classroom</b><br>a. Alphabet/number line at child's level<br>b. Children's print/drawing displayed; other print displayed<br>c. Vocabulary posted<br>d. White space on walls<br>e. Books around the classroom<br>f. Writing materials around the classroom<br>g. Teacher/Child and Child/Child conversations evident throughout the day                                                                                                                                                                                                                                                                                                                                                            |  |                                                                                                                                                                                                                                        | 0      1      2      3      4 |

|                                                                                                                                                                                                                                                                          |  |  |                                      |
|--------------------------------------------------------------------------------------------------------------------------------------------------------------------------------------------------------------------------------------------------------------------------|--|--|--------------------------------------|
| <b>13. Classroom Management</b><br>a. Materials and lesson plans are prepared ahead of time<br>b. Classroom runs according to schedule<br>c. Meaningful transitions included<br>d. Children know/follow the classroom routine<br>e. <a href="#">Children are engaged</a> |  |  | <b>0      1      2      3      4</b> |
|--------------------------------------------------------------------------------------------------------------------------------------------------------------------------------------------------------------------------------------------------------------------------|--|--|--------------------------------------|
