# Supplementary material
Source: publisher figshare collection journal article supplement (https://asha.figshare.com/articles/dataset/_/25345708)

**Supplemental Figure S8.** Preschool Early Literacy Indicators (PELI) Alphabet Knowledge subtest observed means, standard error bars, and between-group *t* test results.

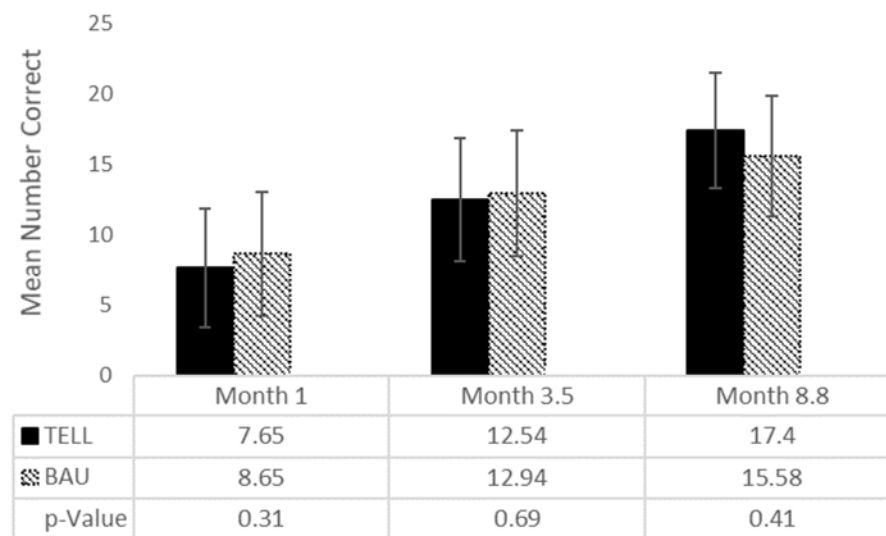

Supplement: Supplementary file 11 [file 1]
